# Supplementary material for: Small sample sizes reduce the replicability of task-based fMRI studies
Source: PubMed Central journal article supplement (PMC6123695; doi:10.1038/s42003-018-0073-z), 2018-06-07
Supplement: 42003_2018_73_MOESM1_ESM.pdf [file 42003_2018_73_MOESM1_ESM.pdf]

Supplementary Table 1, Results of measurables analyses.

| Original measure                | Derived measure    | $d_{MAP}$ | $100 \times \Delta R^2_{MAP}$ |
|---------------------------------|--------------------|-----------|-------------------------------|
| Mean absolute RMS motion        | Mean of mean       | -0.17     | 0.52                          |
|                                 | Diff. of mean      | -0.06     |                               |
|                                 | Mean of std. dev.  | 0.12      |                               |
|                                 | Diff. of std. dev. | -0.03     |                               |
| Contrast power                  | Mean of mean       | 0.06      | 0.17                          |
|                                 | Diff. of mean      | -0.06     |                               |
|                                 | Mean of std. dev.  | 0.03      |                               |
|                                 | Diff. of std. dev. | -0.05     |                               |
| Hat matrix outliers             | Mean of mean       | 0.00      | 0.04                          |
|                                 | Diff. of mean      | -0.08     |                               |
|                                 | Mean of std. dev.  | 0.01      |                               |
|                                 | Diff. of std. dev. | -0.04     |                               |
| Within-participant variability  | Mean of mean       | 0.14      | 0.50                          |
|                                 | Diff. of mean      | -0.11     |                               |
|                                 | Mean of std. dev.  | -0.00     |                               |
|                                 | Diff. of std. dev. | -0.09     |                               |
| Between-participant variability | Mean of mean       | 0.27      | 0.94                          |
|                                 | Diff. of mean      | -0.13     |                               |
|                                 | Mean of std. dev.  | 0.06      |                               |
|                                 | Diff. of std. dev. | -0.07     |                               |
| Sample size                     | Identity           | 1.71      | 31.74                         |

Supplementary Table 2, HCP subject IDs of all subjects included in HCP analyses.

|        |        |        |        |        |        |        |        |        |        |
|--------|--------|--------|--------|--------|--------|--------|--------|--------|--------|
| 100307 | 120212 | 141826 | 161327 | 181232 | 205725 | 298455 | 485757 | 654754 | 837560 |
| 100408 | 120515 | 142828 | 161630 | 182739 | 205826 | 303119 | 486759 | 665254 | 837964 |
| 101006 | 121618 | 143325 | 161731 | 183034 | 208024 | 303624 | 497865 | 672756 | 845458 |
| 101107 | 122317 | 144832 | 162026 | 185139 | 208226 | 304020 | 499566 | 673455 | 849971 |
| 101309 | 122620 | 145834 | 162228 | 185442 | 208327 | 307127 | 500222 | 677968 | 856766 |
| 101410 | 123117 | 146331 | 162329 | 186141 | 209834 | 308331 | 510326 | 679568 | 857263 |
| 101915 | 123420 | 146432 | 162733 | 187143 | 209935 | 310621 | 519950 | 680957 | 859671 |
| 102008 | 123925 | 147030 | 163129 | 187547 | 210011 | 316633 | 522434 | 683256 | 861456 |
| 102311 | 124220 | 147737 | 163331 | 187850 | 210415 | 329440 | 530635 | 687163 | 865363 |
| 102816 | 124422 | 148032 | 163432 | 188347 | 210617 | 334635 | 531536 | 690152 | 871762 |
| 103111 | 124826 | 148335 | 163836 | 189349 | 211215 | 339847 | 540436 | 695768 | 871964 |
| 103414 | 125525 | 148840 | 164030 | 189450 | 211316 | 351938 | 541943 | 702133 | 872764 |
| 103515 | 126325 | 148941 | 164131 | 190031 | 211417 | 352132 | 545345 | 704238 | 877269 |
| 103818 | 126628 | 149337 | 164939 | 191033 | 211720 | 352738 | 547046 | 705341 | 885975 |
| 104820 | 127630 | 149539 | 166438 | 191336 | 211922 | 355239 | 552544 | 709551 | 887373 |
| 105014 | 127933 | 149741 | 167036 | 191841 | 212116 | 356948 | 559053 | 713239 | 889579 |
| 105115 | 128127 | 150423 | 167743 | 192439 | 212217 | 361941 | 561242 | 715041 | 894673 |
| 105216 | 128632 | 150524 | 168139 | 192540 | 212318 | 365343 | 562446 | 729557 | 896778 |
| 106016 | 129028 | 150625 | 168341 | 192843 | 212419 | 366042 | 565452 | 732243 | 896879 |
| 106319 | 130013 | 150726 | 169444 | 193239 | 214019 | 366446 | 566454 | 734045 | 898176 |
| 106521 | 130316 | 151223 | 170934 | 194140 | 214221 | 371843 | 567052 | 742549 | 899885 |
| 107321 | 130922 | 151526 | 171633 | 194645 | 214423 | 377451 | 567961 | 748258 | 901038 |
| 107422 | 131217 | 151627 | 172029 | 194847 | 214726 | 380036 | 568963 | 749361 | 901139 |
| 108121 | 131722 | 151728 | 172130 | 195041 | 217126 | 382242 | 570243 | 751348 | 901442 |
| 108323 | 131924 | 152831 | 172332 | 195849 | 217429 | 385450 | 573249 | 753251 | 904044 |
| 108525 | 133019 | 153025 | 172534 | 196144 | 221319 | 386250 | 573451 | 756055 | 907656 |
| 108828 | 133625 | 153429 | 172938 | 196750 | 224022 | 390645 | 579665 | 759869 | 910241 |
| 109123 | 133827 | 153833 | 173334 | 197348 | 231928 | 395958 | 580044 | 761957 | 912447 |
| 109325 | 133928 | 154431 | 173435 | 197550 | 233326 | 397154 | 581349 | 765056 | 917255 |
| 110411 | 134324 | 154734 | 173536 | 198350 | 239944 | 397760 | 583858 | 770352 | 922854 |
| 111312 | 135225 | 154835 | 173940 | 198451 | 245333 | 397861 | 585862 | 771354 | 930449 |
| 111413 | 135528 | 154936 | 175035 | 198855 | 246133 | 412528 | 586460 | 779370 | 932554 |
| 111716 | 135932 | 155231 | 175439 | 199150 | 249947 | 414229 | 592455 | 782561 | 951457 |

|        |        |        |        |        |        |        |        |        |        |
|--------|--------|--------|--------|--------|--------|--------|--------|--------|--------|
| 113215 | 136227 | 155635 | 176542 | 199453 | 250427 | 415837 | 594156 | 784565 | 957974 |
| 113619 | 136833 | 156233 | 177645 | 199655 | 250932 | 422632 | 598568 | 786569 | 958976 |
| 113922 | 137027 | 156637 | 178142 | 199958 | 251833 | 433839 | 599469 | 788876 | 959574 |
| 114419 | 137128 | 157336 | 178748 | 200109 | 255639 | 436239 | 599671 | 789373 | 965367 |
| 114924 | 137633 | 157437 | 178849 | 200614 | 256540 | 436845 | 601127 | 792564 | 965771 |
| 115320 | 137936 | 158035 | 178950 | 201111 | 268850 | 441939 | 613538 | 792766 | 978578 |
| 116524 | 138231 | 158136 | 179346 | 201414 | 280739 | 445543 | 620434 | 802844 | 979984 |
| 117122 | 138534 | 158540 | 179548 | 201818 | 284646 | 448347 | 622236 | 814649 | 983773 |
| 117324 | 139233 | 159138 | 180129 | 203418 | 285345 | 465852 | 623844 | 816653 | 984472 |
| 118528 | 139637 | 159239 | 180432 | 204016 | 285446 | 473952 | 627549 | 826353 | 987983 |
| 118730 | 140117 | 159340 | 180836 | 204521 | 290136 | 475855 | 638049 | 826454 | 991267 |
| 118932 | 140824 | 159441 | 180937 | 205119 | 293748 | 479762 | 644044 | 833148 | 992774 |
| 119833 | 140925 | 160123 | 181131 | 205220 | 298051 | 480141 | 645551 | 833249 | 994273 |
| 120111 | 141422 | 160830 |        |        |        |        |        |        |        |

Supplementary Table 3, HCP tasks and contrasts.

| Task abbreviation | Task name  | Contrast number | Contrast description      |
|-------------------|------------|-----------------|---------------------------|
| Emot              | EMOTION    | 3               | Faces vs shapes           |
| Gamb              | GAMBLING   | 3               | Punish vs reward          |
| Lang              | LANGUAGE   | 4               | Story vs math             |
| Motor             | MOTOR      | 7               | Average motor vs fixation |
| Rel               | RELATIONAL | 4               | Relation vs match         |
| Social            | SOCIAL     | 6               | Theory-of-mind vs random  |
| WM                | WM         | 11              | 2-back vs 0-back          |

Supplementary Table 4, Proportions suprathreshold.

| Task   | Proportion suprathreshold |              |
|--------|---------------------------|--------------|
|        | Liberal                   | Conservative |
| 3-back | 0.115                     | 0.025        |
| ObLoc  | 0.260                     | 0.131        |
| PPA    | 0.429                     | 0.227        |
| SST    | 0.133                     | 0.044        |
| Emot   | 0.344                     | 0.191        |
| Gamb   | 0.149                     | 0.040        |
| Lang   | 0.669                     | 0.498        |
| Motor  | 0.444                     | 0.273        |
| Rel    | 0.269                     | 0.116        |
| Social | 0.432                     | 0.271        |
| WM     | 0.408                     | 0.250        |

Proportion suprathreshold in full-sample analyses for each task, using adaptive thresholds given in Table 1.

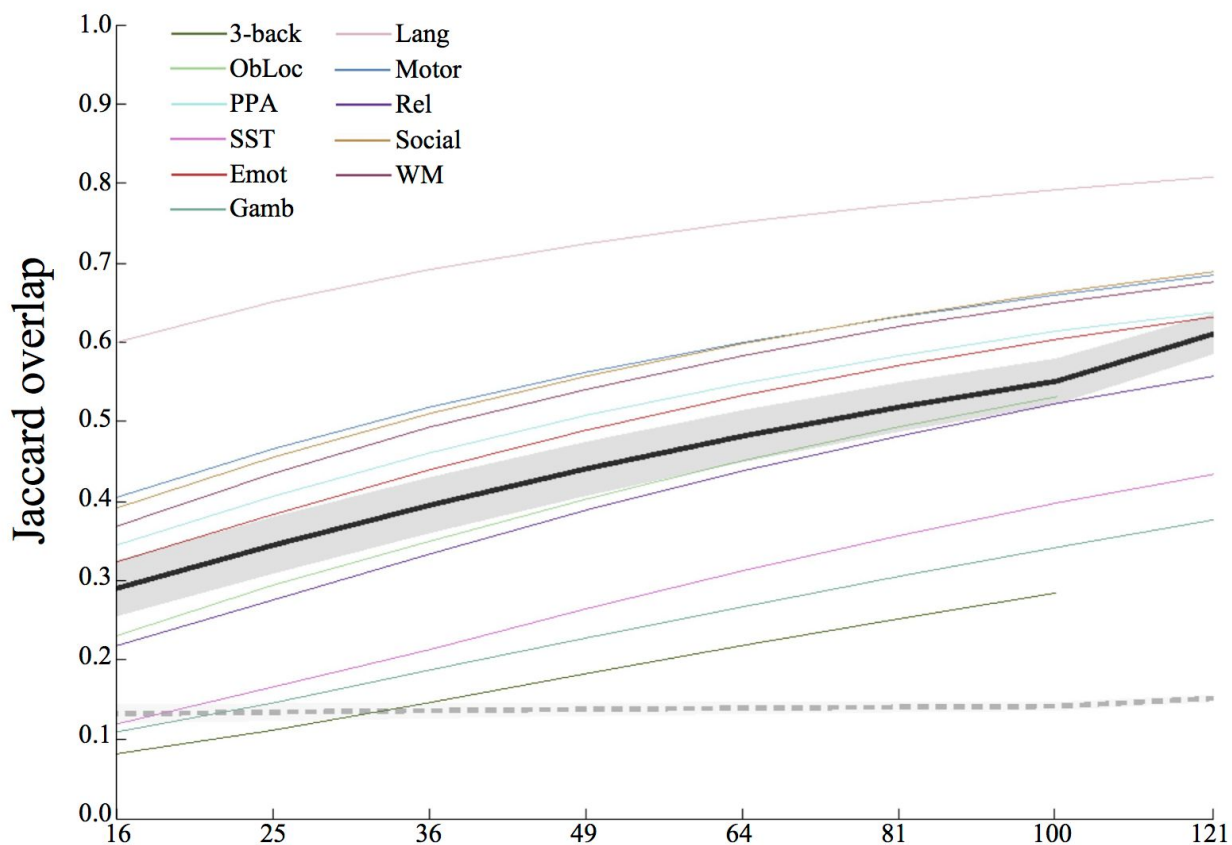

Supplementary Figure 1, Liberally thresholded voxel-level results. Replicability results for voxel-level (thresholded liberally) analyses, measured as the Jaccard overlap between paired group maps—that is the ratio of the number of voxels in the intersection of the two thresholded maps to the number of voxels in the union of the two. Average observed ( $\pm 1$  mean within-task standard deviation) shown in black (dark gray); average null ( $\pm 1$  standard deviation) shown in dashed medium gray (light gray). Also shown are individual task curves for each task (colors given in legend; refer to Table 1 for task abbreviations).

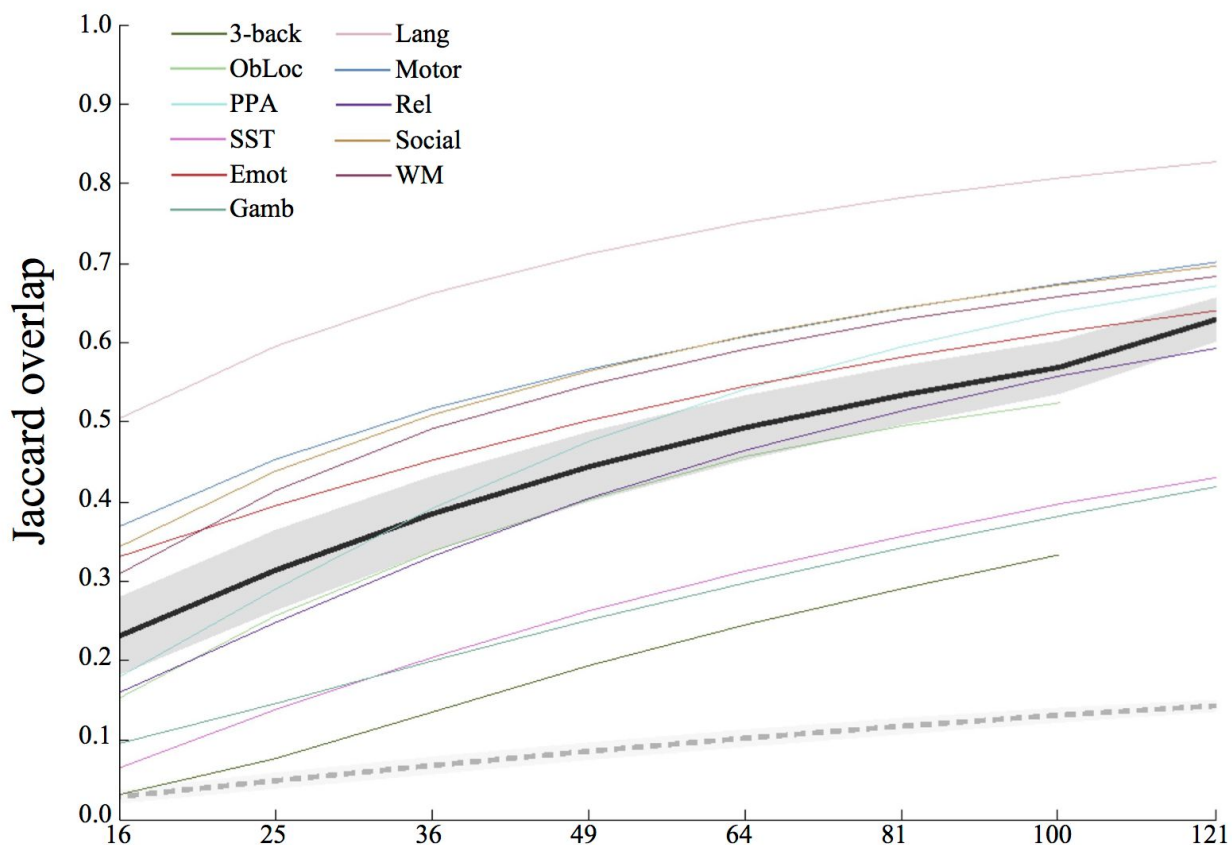

Supplementary Figure 2, Liberally thresholded cluster-level results. Replicability results for cluster-level (thresholded liberally) analyses, measured as the Jaccard overlap between paired group maps—that is the ratio of the number of voxels in the intersection of the two thresholded maps to the number of voxels in the union of the two. Average observed ( $\pm 1$  mean within-task standard deviation) shown in black (dark gray); average null ( $\pm 1$  standard deviation) shown in dashed medium gray (light gray). Also shown are individual task curves for each task (colors given in legend; refer to Table 1 for task abbreviations).

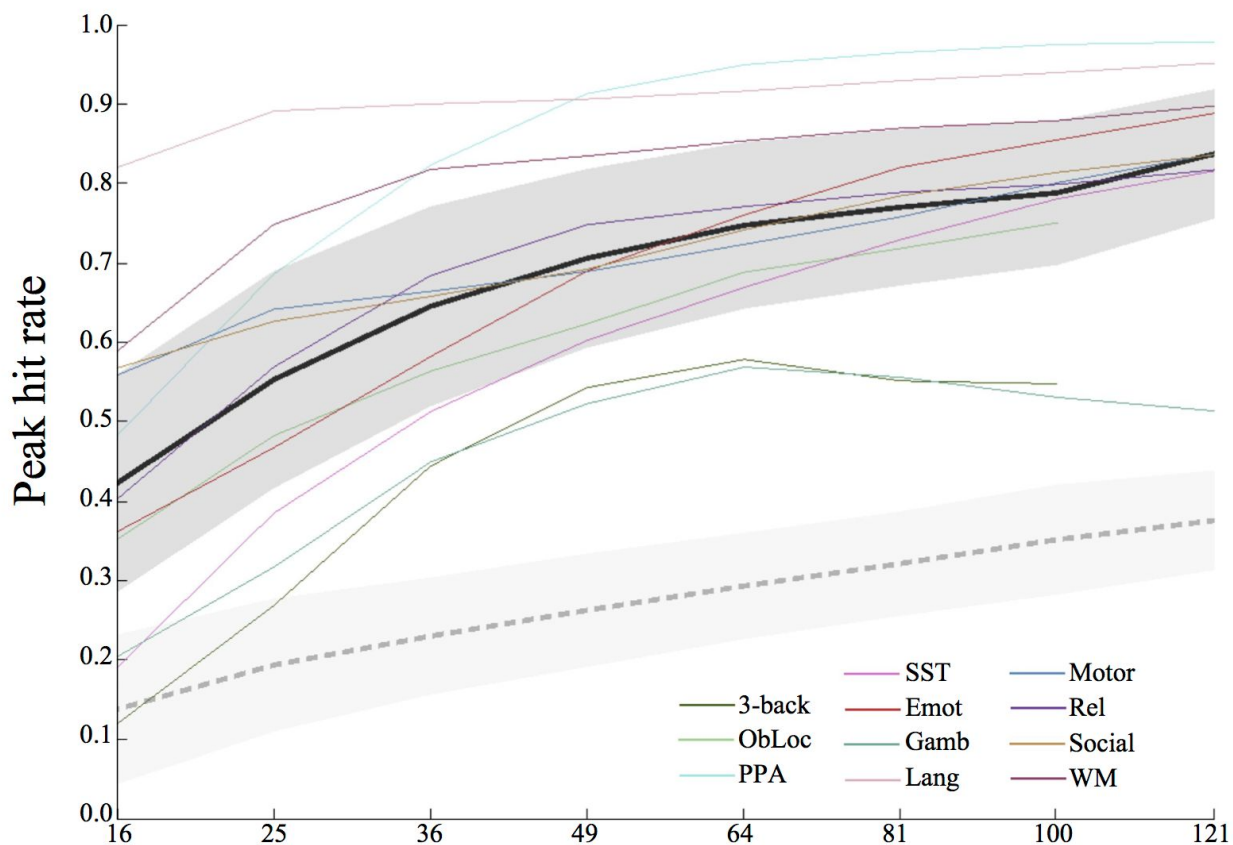

Supplementary Figure 3, Liberally thresholded peak-level results. Replicability results for suprathreshold peak-level (thresholded liberally) analyses, measured as the peak hit rate—that is, the proportion of cluster peaks in one map in each pair that are suprathreshold in the other map. Average observed ( $\pm 1$  mean within-task standard deviation) shown in black (dark gray); average null ( $\pm 1$  standard deviation) shown in dashed medium gray (light gray). Also shown are individual task curves for each task (colors given in legend; refer to Table 1 for task abbreviations).



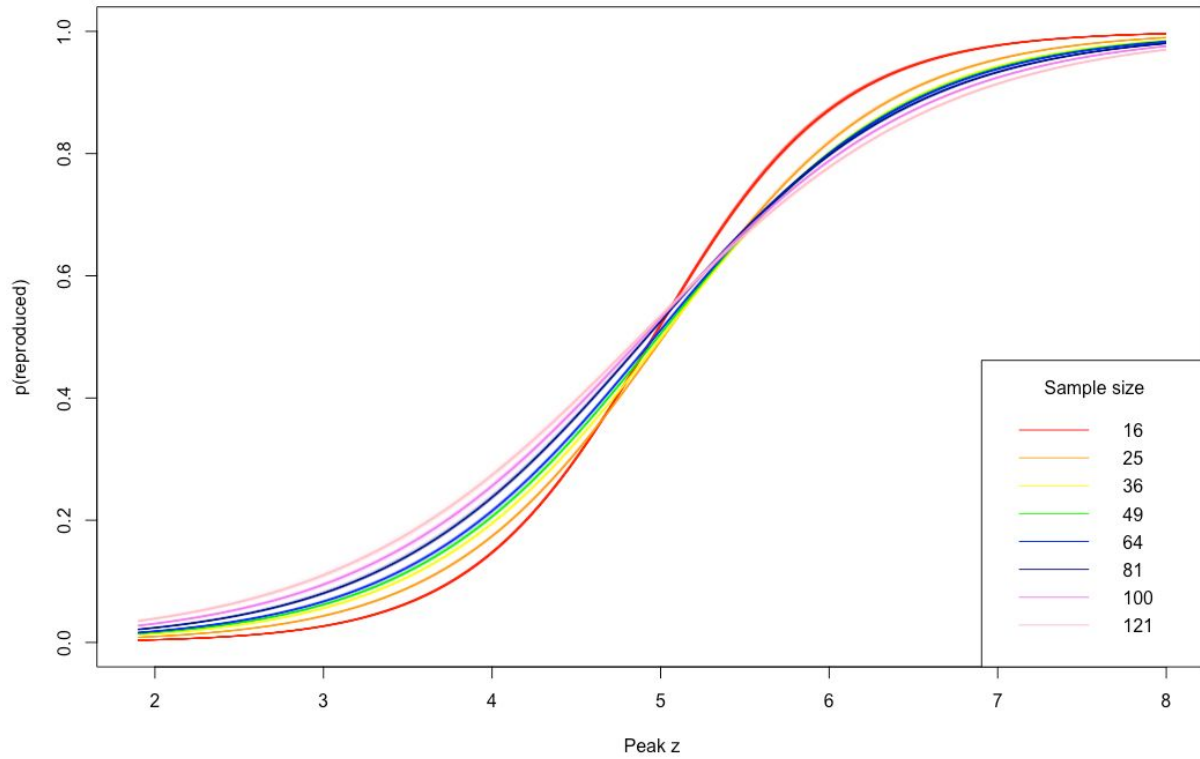

Supplementary Figure 4, Replicability as a function of peak  $z$  value and sample size (conservative threshold). Curves show logistic regression model-fit results (with 95% confidence intervals) for the relationship between peak  $z$  value and the probability of the peak being suprathreshold in the corresponding map, separately for each sample size.

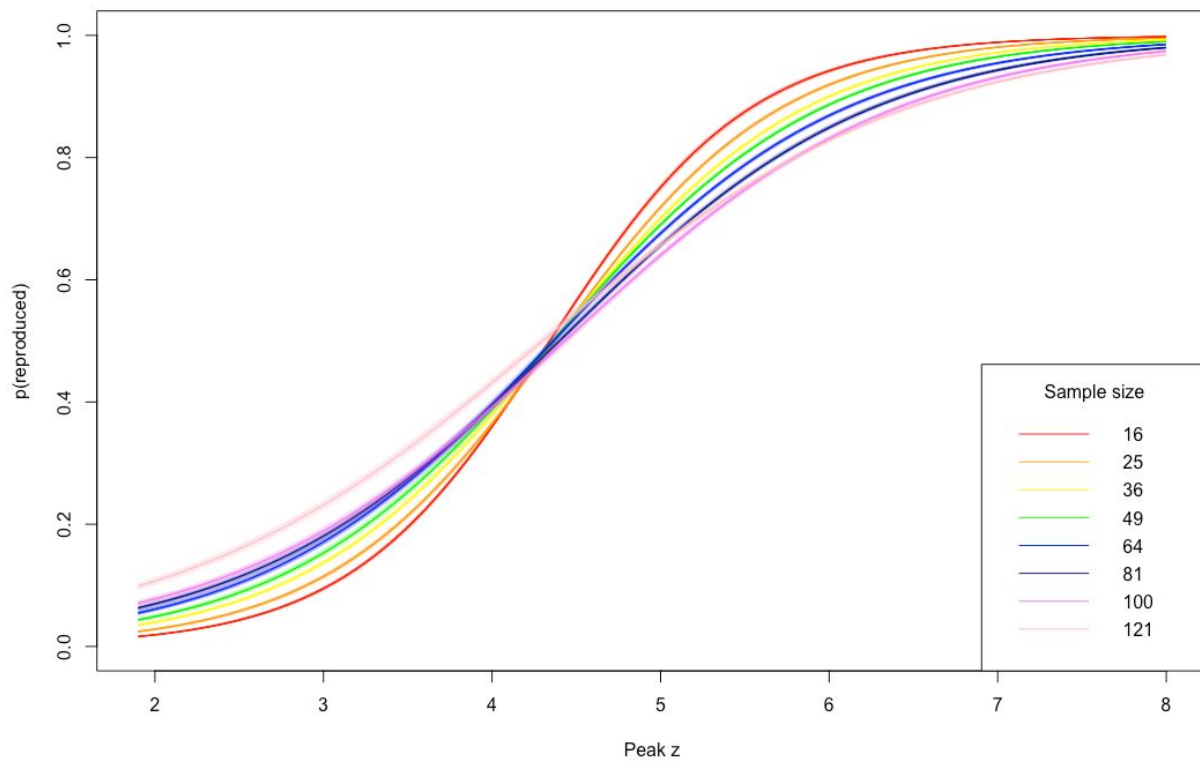

Supplementary Figure 5, Replicability as a function of peak  $z$  value and sample size (liberal threshold). Curves show logistic regression model-fit results (with 95% confidence intervals) for the relationship between peak  $z$  value and the probability of the peak being suprathreshold in the corresponding map, separately for each sample size.
